# Supplementary material
Source: Springer Nature journal article supplement (https://www.springermedizin.de/resource/supplementary/13256_2010_1298_MOESM2_ESM.pdf/9647450)

T

2DG  
97  
DR  
55

14L7  
14.0  
16 fps

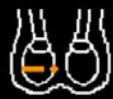

#100  
IP5

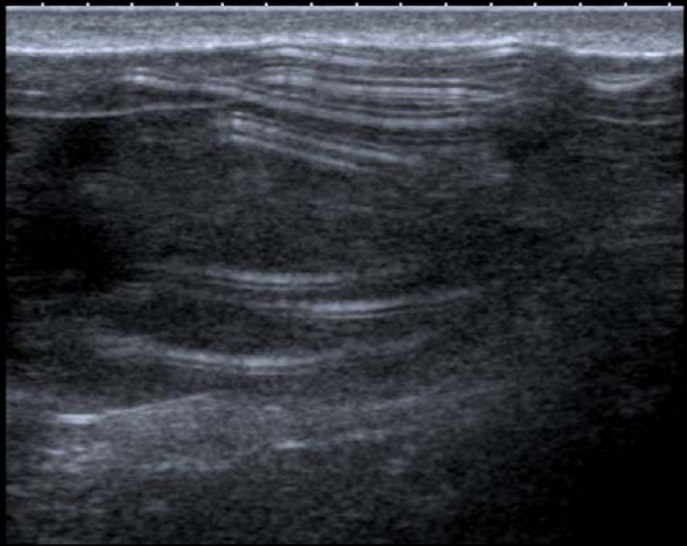

0 ♦  
.  
.  
.  
1 ♦  
.  
.  
.  
2 ♦  
.  
.  
.  
3 ♦

Supplement: MOESM2 [file 9647450]
